# Supplementary material for: ABPEPserver: a web application for documentation and analysis of substitutants
Source: BMC Cancer. 2023 Jun 3;23:502. doi: 10.1186/s12885-023-10970-8 (PMC10239192; doi:10.1186/s12885-023-10970-8)
Supplement: Supplementary file 2 — Additional file 2: Supplementary Table 1. Philosopher parameters used for scanning and detecting substitutant peptides in cancer proteomes. [file 12885_2023_10970_MOESM2_ESM.xlsx]

## Sheet: Blad1
# Philosopher pipeline configuration file
# Version 3.6.0
#
# The pipeline mode automates the processing done by Philosopher and other tools. First, check
# the steps you want to execute in the commands section and change them to
# 'yes'. For each selected command, go to its section and adjust the parameters
# accordingly to your analysis.
#
# If you want to include MSFragger and TMT-Integrator into your analysis, you will
# have to download them separately, and then add their location in their
# configuration section.
#
# Usage:
# philosopher pipeline --config <this_configuration_file> [list_of_data_set_folders]
analytics: true	# reports when a workspace is created for usage statistics						# reports when a workspace is created for usage statistics
slackToken:	# specify the Slack API token (how to generate a token: https://api.slack.com/legacy/custom-integrations/legacy-tokens)						# specify the Slack API token (how to generate a token: https://api.slack.com/legacy/custom-integrations/legacy-tokens)
slackChannel:	# specify the channel name, or						# specify the channel name, or
slackUserID:	# specify a user ID for a direct message						# specify a user ID for a direct message
Steps:
Database Search: yes	# peptide to spectrum matching with Comet or MSFragger
Peptide Validation: yes	# peptide assignment validation with PeptideProphet
PTM Localization: no	# PTM site localization with PTMProphet
Protein Inference: no	# protein identification validation with ProteinProphet
Label-Free Quantification: yes	# precursor label-free quantification inspired by moFF
Isobaric Quantification: yes	# isobaric labeling-based relative quantification for TMT and iTRAQ
Bio Cluster Quantification: no	# protein report based on Uniprot protein clusters
FDR Filtering: yes	# statistical filtering, validation and false discovery r ates assessment
Individual Reports: yes	# multi-level reporting for both narrow-searches and open-searches
Integrated Reports: no	# combined analysis of LC-MS/MS results inspired by Abacus
Integrated Isobaric Quantification: yes	# integrates channel abundances from multiple isobaric-tagged samples with TMT-Integrator
Database Search:	# MSFragger 3.2 & Comet
protein_database: []	# path to the target-decoy protein database
decoy_tag: rev_	# prefix tag used added to decoy sequences
contaminant_tag: false	# prefix tag used added to decoy sequences
search_engine: msfragger	# search engine options include "comet" and "msfragger"
comet:	# Comet v2019011
noindex: true	# skip mzML file indexing
param:	# comet parameter file (default "comet.params.txt")
extension: mzML	# format of the spectra file
msfragger:	# MSFragger v3.0
path: []	# path to MSFragger jar
memory: 32	# how much memory in GB to use
param:	# MSFragger parameter file
extension: mzML	# spectra format
data_type: 0	# 0 for DDA, 1 for DIA, 2 for DIA-narrow-window
num_threads: 32	# 0=poll CPU to set num threads; else specify num threads directly (max 64)
precursor_mass_lower: -20	# lower bound of the precursor mass window
precursor_mass_upper: 20	# upper bound of the precursor mass window
precursor_mass_units: 1	# 0=Daltons, 1=ppm
precursor_true_tolerance: 20	# true precursor mass tolerance (window is +/- this value)
precursor_true_units: 1	# 0=Daltons, 1=ppm
fragment_mass_tolerance: 20	# fragment mass tolerance (window is +/- this value)
fragment_mass_units: 1	# fragment mass tolerance units (0 for Da, 1 for ppm)
calibrate_mass: 2	# 0=Off, 1=On, 2=On and find optimal parameters
deneutralloss: 0	# Perform deneutrallossing or not (0=no, 1=yes)
deisotope: 1	# activates deisotoping.
isotope_error: -1/0/1/2/3	# 0=off, 0/1/2 (standard C13 error)
mass_offsets: 0	# allow for additional precursor mass window shifts. Multiplexed with isotope_error. mass_offsets = 0/79.966 can be used as a restricted ‘open’ search that looks for unmodified and phosphorylated peptides (on any residue)
precursor_mass_mode: selected	# selected or isolated
localize_delta_mass: 0	# this allows shifted fragment ions - fragment ions with mass increased by the calculated mass difference, to be included in scoring
delta_mass_exclude_ranges: (-1.5,3.5)	# exclude mass range for shifted ions searching
fragment_ion_series: b,y	# ion series used in search
ion_series_definitions:	# User defined ion series. (Example: b* N -17.026548;b0 N -18.010565)
search_enzyme_name: Trypsin	# name of enzyme to be written to the pepXML file
search_enzyme_cutafter: KR	# residues after which the enzyme cuts
search_enzyme_butnotafter: P	# residues that the enzyme will not cut before
num_enzyme_termini: 2	# 2 for enzymatic, 1 for semi-enzymatic, 0 for nonspecific digestion
allowed_missed_cleavage: 2	# maximum value is 5
clip_nTerm_M: 1	# specifies the trimming of a protein N-terminal methionine as a variable modification (0 or 1)
variable_mod_01: 15.99490 M 3	# variable modification
variable_mod_02: 42.01060 [^ 1	# variable modification
variable_mod_03: 229.162932 n^ 1	# variable modification
variable_mod_04: 229.162932 S 1	# variable modification
variable_mod_05:	# variable modification
variable_mod_06:	# variable modification
variable_mod_07:	# variable modification
allow_multiple_variable_mods_on_residue: 0	# static mods are not considered
max_variable_mods_per_peptide: 3	# maximum of 5
max_variable_mods_combinations: 5000	# maximum of 65534, limits number of modified peptides generated from sequence
output_file_extension: pepXML	# file extension of output files
output_format: pepXML	# file format of output files (pepXML or tsv)
write_calibrated_mgf: 0	# Write calibrated MS2 scan to a MGF file (0 for No, 1 for Yes)
output_report_topN: 1	# reports top N PSMs per input spectrum
output_max_expect: 50	# suppresses reporting of PSM if top hit has expectation greater than this threshold
report_alternative_proteins: 0	# 0=no, 1=yes
precursor_charge: 1 6	# assume range of potential precursor charge states. Only relevant when override_charge is set to 1
override_charge: 0	# 0=no, 1=yes to override existing precursor charge states with precursor_charge parameter
digest_min_length: 7	# minimum length of peptides to be generated during in-silico digestion
digest_max_length: 50	# maximum length of peptides to be generated during in-silico digestion
digest_mass_range: 500.0 5000.0	# mass range of peptides to be generated during in-silico digestion in Daltons
max_fragment_charge: 2	# maximum charge state for theoretical fragments to match (1-4)
track_zero_topN: 0	# in addition to topN results, keep track of top results in zero bin
zero_bin_accept_expect: 0	# boost top zero bin entry to top if it has expect under 0.01 - set to 0 to disable
zero_bin_mult_expect: 1	# disabled if above passes - multiply expect of zero bin for ordering purposes (does not affect reported expect)
add_topN_complementary: 0	# inserts complementary ions corresponding to the top N most intense fragments in each experimental spectra
minimum_peaks: 15	# required minimum number of peaks in spectrum to search (default 10)
use_topN_peaks: 300	# pre-process experimental spectrum to only use top N peaks
min_fragments_modelling: 2	# minimum number of matched peaks in PSM for inclusion in statistical modeling
min_matched_fragments: 4	# minimum number of matched peaks for PSM to be reported
minimum_ratio: 0.01	# filters out all peaks in experimental spectrum less intense than this multiple of the base peak intensity
clear_mz_range: 125.0 131.0	# for iTRAQ/TMT type data; will clear out all peaks in the specified m/z range
remove_precursor_peak: 0	# remove precursor peaks from tandem mass spectra. 0=not remove; 1=remove the peak with precursor charge; 2=remove the peaks with all charge states.
remove_precursor_range: -1.5,1.5	# m/z range in removing precursor peaks. Unit: Da.
intensity_transform: 0	# transform peaks intensities with sqrt root. 0=not transform; 1=transform using sqrt root.
mass_diff_to_variable_mod: 0	# Put mass diff as a variable modification. 0 for no; 1 for yes and change the original mass diff and the calculated mass accordingly; 2 for yes but do not change the original mass diff.
labile_search_mode: off	# type of search (nglycan, labile, or off). Off means non-labile/typical search.
restrict_deltamass_to: all	# Specify amino acids on which delta masses (mass offsets or search modifications) can occur. Allowed values are single letter codes (e.g. ACD), must
diagnostic_intensity_filter: 0	# [nglycan/labile search_mode only]. Minimum relative intensity for SUM of all detected oxonium ions to achieve for spectrum to contain diagnostic fragment evidence. Calculated relative to spectrum base peak. 0 <= value.
Y_type_masses: 0	# [nglycan/labile search_mode only]. Specify fragments of labile mods that are commonly retained on intact peptides (e.g. Y ions for glycans). Only used if 'Y' is included in fragment_ion_series.
diagnostic_fragments: 1	# [nglycan/labile search_mode only]. Specify diagnostic fragments of labile mods that appear in the low m/z region. Only used if diagnostic_intensity_filter > 0.
add_Cterm_peptide: 0.000000	# c-term peptide fixed modifications
add_Cterm_protein: 0.000000	# c-term protein fixed modifications
add_Nterm_peptide: 0.000000	# n-term peptide fixed modifications
add_Nterm_protein: 0.000000	# n-term protein fixed modifications
add_A_alanine: 0.000000	# alanine fixed modifications
add_C_cysteine: 57.021464	# cysteine fixed modifications
add_D_aspartic_acid: 0.000000	# aspartic acid fixed modifications
add_E_glutamic_acid: 0.000000	# glutamic acid fixed modifications
add_F_phenylalanine: 0.000000	# phenylalanine fixed modifications
add_G_glycine: 0.000000	# glycine fixed modifications
add_H_histidine: 0.000000	# histidine fixed modifications
add_I_isoleucine: 0.000000	# isoleucine fixed modifications
add_K_lysine: 229.162932	# lysine fixed modifications
add_L_leucine: 0.000000	# leucine fixed modifications
add_M_methionine: 0.000000	# methionine fixed modifications
add_N_asparagine: 0.000000	# asparagine fixed modifications
add_P_proline: 0.000000	# proline fixed modifications
add_Q_glutamine: 0.000000	# glutamine fixed modifications
add_R_arginine: 0.000000	# arginine fixed modifications
add_S_serine: 0.000000	# serine fixed modifications
add_T_threonine: 0.000000	# threonine fixed modifications
add_V_valine: 0.000000	# valine fixed modifications
add_W_tryptophan: 0.000000	# tryptophan fixed modifications
add_Y_tyrosine: 0.000000	# tyrosine fixed modifications
Peptide Validation:	# PeptideProphet v5.2
concurrent: false	# Concurrent execution of multiple instaces
extension: pepXML	# pepXML file extension
clevel: 0	# set Conservative Level in neg_stdev from the neg_mean, low numbers are less conservative, high numbers are more conservative
accmass: true	# use Accurate Mass model binning
decoyprobs: true	# compute possible non-zero probabilities for Decoy entries on the last iteration
enzyme: trypsin	# enzyme used in sample (optional)
exclude: false	# exclude deltaCn*, Mascot*, and Comet* results from results (default Penalize * results)
expectscore: true	# use expectation value as the only contributor to the f-value for modeling
forcedistr: false	# bypass quality control checks, report model despite bad modeling
glyc: false	# enable peptide Glyco motif model
icat: false	# apply ICAT model (default Autodetect ICAT)
instrwarn: false	# warn and continue if combined data was generated by different instrument models
leave: false	# leave alone deltaCn*, Mascot*, and Comet* results from results (default Penalize * results)
maldi: false	# enable MALDI mode
masswidth: 5	# model mass width (default 5)
minpeplen: 7	# minimum peptide length not rejected (default 7)
minpintt: 2	# minimum number of NTT in a peptide used for positive pI model (default 2)
minpiprob: 0.9	# minimum probability after first pass of a peptide used for positive pI model (default 0.9)
minprob: 0.05	# report results with minimum probability (default 0.05)
minrtntt: 2	# minimum number of NTT in a peptide used for positive RT model (default 2)
minrtprob: 0.9	# minimum probability after first pass of a peptide used for positive RT model (default 0.9)
neggamma: false	# use Gamma distribution to model the negative hits
noicat: false	# do no apply ICAT model (default Autodetect ICAT)
nomass: false	# disable mass model
nonmc: false	# disable NMC missed cleavage model
nonparam: true	# use semi-parametric modeling, must be used in conjunction with --decoy option
nontt: false	# disable NTT enzymatic termini model
optimizefval: false	# (SpectraST only) optimize f-value function f(dot,delta) using PCA
phospho: false	# enable peptide Phospho motif model
pi: false	# enable peptide pI model
ppm: true	# use PPM mass error instead of Dalton for mass modeling
zero: false	# report results with minimum probability 0
PTM Localization:	# PTMProphet v6.0
autodirect: false	# use direct evidence when the lability is high, use in combination with LABILITY
cions:	# use specified C-term ions, separate multiple ions by commas (default: y for CID, z for ETD)
direct: false	# use only direct evidence for evaluating PTM site probabilities
em: 2	# set EM models to 0 (no EM), 1 (Intensity EM Model Applied) or 2 (Intensity and Matched Peaks EM Models Applied)
static: false	# use static fragppmtol for all PSMs instead of dynamically estimates offsets and tolerances
fragppmtol: 15	# when computing PSM-specific mass_offset and mass_tolerance, use specified default +/- MS2 mz tolerance on fragment ions
ifrags: false	# use internal fragments for localization
keepold: false	# retain old PTMProphet results in the pepXML file
lability: false	# compute Lability of PTMs
massdiffmode: false	# use the Mass Difference and localize
excludemassdiffmin: 0	# Minimum mass difference excluded for MASSDIFFFMODE analysis (default=0)
excludemassdiffmax: 0	# Maximun mass difference excluded for MASSDIFFFMODE analysis (default=0)
massoffset: 0	# adjust the massdiff by offset (0 = use default)
maxfragz: 0	# limit maximum fragment charge (default: 0=precursor charge, negative values subtract from precursor charge)
maxthreads: 4	# use specified number of threads for processing
mino: 0	# use specified number of pseudo-counts when computing Oscore (0 = use default)
minprob: 0	# use specified minimum probability to evaluate peptides
mods:	# specify modifications
nions:	# use specified N-term ions, separate multiple ions by commas (default: a,b for CID, c for ETD)
nominofactor: false	# disable MINO factor correction when MINO= is set greater than 0 (default: apply MINO factor correction)
ppmtol: 1	# use specified +/- MS1 ppm tolerance on peptides which may have a slight offset depending on search parameters
verbose: false	# produce Warnings to help troubleshoot potential PTM shuffling or mass difference issues
Protein Inference:	# ProteinProphet v5.2
accuracy: false	# equivalent to --minprob 0
allpeps: false	# consider all possible peptides in the database in the confidence model
confem: false	# use the EM to compute probability given the confidence
delude: false	# do NOT use peptide degeneracy information when assessing proteins
excludezeros: false	# exclude zero prob entries
fpkm: false	# model protein FPKM values
glyc: false	# highlight peptide N-glycosylation motif
icat: false	# highlight peptide cysteines
instances: false	# use Expected Number of Ion Instances to adjust the peptide probabilities prior to NSP adjustment
iprophet: false	# input is from iProphet
logprobs: false	# use the log of the probabilities in the Confidence calculations
maxppmdiff: 20	# maximum peptide mass difference in PPM (default 20)
minprob: 0.05	# peptideProphet probabilty threshold (default 0.05)
mufactor: 1	# fudge factor to scale MU calculation (default 1)
nogroupwts: false	# check peptide's Protein weight against the threshold (default: check peptide's Protein Group weight against threshold)
nonsp: false	# do not use NSP model
nooccam: false	# non-conservative maximum protein list
noprotlen: false	# do not report protein length
normprotlen: false	# normalize NSP using Protein Length
protmw: false	# get protein mol weights
softoccam: false	# peptide weights are apportioned equally among proteins within each Protein Group (less conservative protein count estimate)
unmapped: false	# report results for UNMAPPED proteins
Label-Free Quantification:	# Freequant
peakTimeWindow: 0.4	# specify the time windows for the peak (minute) (default 0.4)
retentionTimeWindow: 3	# specify the retention time window for xic (minute) (default 3)
tolerance: 10	# m/z tolerance in ppm (default 10)
raw: false	# read raw files instead of converted mzML, or mzXML
faims: false	# use FAIMS information for the quantification
Isobaric Quantification:	# Labelquant
bestPSM: true	# select the best PSMs for protein quantification
level: 2	# ms level for the quantification
minProb: 0.7	# only use PSMs with a minimum probability score
plex: 11	# number of channels
purity: 0.5	# ion purity threshold (default 0.5)
removeLow: 0.05	# ignore the lower 3% PSMs based on their summed abundances
tolerance: 20	# m/z tolerance in ppm (default 20)
uniqueOnly: false	# report quantification based on only unique peptides
brand: tmt	# isobaric labeling brand (tmt, itraq)
raw: false	# read raw files instead of converted mzML, or mzXML
Bio Cluster Quantification:	# BioQuant
organismUniProtID:	# UniProt proteome ID
level: 0.9	# cluster identity level (default 0.9)
FDR Filtering:	# Filter
psmFDR: 0.01	# psm FDR level (default 0.01)
peptideFDR: 0.01	# peptide FDR level (default 0.01)
ionFDR: 0.01	# peptide ion FDR level (default 0.01)
proteinFDR: 0.01	# protein FDR level (default 0.01)
peptideProbability: 0.7	# top peptide probability threshold for the FDR filtering (default 0.7)
proteinProbability: 0.5	# protein probability threshold for the FDR filtering (not used with the razor algorithm) (default 0.5)
peptideWeight: 1	# threshold for defining peptide uniqueness (default 1)
razor: true	# use razor peptides for protein FDR scoring
picked: true	# apply the picked FDR algorithm before the protein scoring
mapMods: true	# map modifications acquired by an open search
models: true	# print model distribution
sequential: true	# alternative algorithm that estimates FDR using both filtered PSM and Protein lists
Individual Reports:	# Report
msstats: false	# create an output compatible to MSstats
withDecoys: false	# add decoy observations to reports
mzID: false	# create a mzID output
Integrated Reports:	# Abacus
protein: true	# global level protein report
peptide: true	# global level peptide report
proteinProbability: 0.9	# minimum protein probability (default 0.9)
peptideProbability: 0.5	# minimum peptide probability (default 0.5)
uniqueOnly: false	# report TMT quantification based on only unique peptides
reprint: false	# create abacus reports using the Reprint format
Integrated Isobaric Quantification:	# TMT-Integrator v1.1.10
path: []	# path to TMT-Integrator jar
memory: 32	# memory allocation, in Gb
output: TMTIntegrator_output_false	# the location of output files
channel_num: 11	# number of channels in the multiplex (e.g. 10, 11)
ref_tag: Pool	# unique tag for identifying the reference channel (Bridge sample added to each multiplex)
groupby: -1	# level of data summarization(0: PSM aggregation to the gene level; 1: protein; 2: peptide sequence; 3: PTM site; -1: generate reports at all levels)
psm_norm: false	# perform additional retention time-based normalization at the PSM level
outlier_removal: true	# perform outlier removal
prot_norm: -1	# normalization (0: None; 1: MD (median centering); 2: GN (median centering + variance scaling); -1: generate reports with all normalization options)
min_pep_prob: 0.9	# minimum PSM probability threshold (in addition to FDR-based filtering by Philosopher)
min_purity: 0.5	# ion purity score threshold
min_percent: 0.05	# remove low intensity PSMs (e.g. value of 0.05 indicates removal of PSMs with the summed TMT reporter ions intensity in the lowest 5% of all PSMs)
unique_pep: false	# allow PSMs with unique peptides only (if true) or unique plus razor peptides (if false), as classified by Philosopher and defined in PSM.tsv files
unique_gene: 0	# additional, gene-level uniqueness filter (0: allow all PSMs; 1: remove PSMs mapping to more than one GENE with evidence of expression in the dataset; 2:remove all PSMs mapping to more than one GENE in the fasta file)
best_psm: true	# keep the best PSM only (highest summed TMT intensity) among all redundant PSMs within the same LC-MS run
prot_exclude: none	# exclude proteins with specified tags at the beginning of the accession number (e.g. none: no exclusion; sp|,tr| : exclude protein with sp| or tr|)
allow_overlabel: true	# allow PSMs with TMT on S (when overlabeling on S was allowed in the database search)
allow_unlabeled: true	# allow PSMs without TMT tag or acetylation on the peptide n-terminus
mod_tag: none	# PTM info for generation of PTM-specific reports (none: for Global data; S[167],T[181],Y[243]: for Phospho; K[170]: for K-Acetyl)
min_site_prob: -1	# site localization confidence threshold (-1: for Global; 0: as determined by the search engine; above 0 (e.g. 0.75): PTMProphet probability, to be used with phosphorylation only)
ms1_int: true	# use MS1 precursor ion intensity (if true) or MS2 summed TMT reporter ion intensity (if false) as part of the reference sample abundance estimation
top3_pep: true	# use top 3 most intense peptide ions as part of the reference sample abundance estimation
print_RefInt: false	# print individual reference sample abundance estimates for each multiplex in the final reports (in addition to the combined reference sample abundance estimate)
add_Ref: -1	# add an artificial reference channel if there is no reference channel (-1: don't add the reference; 0: use summation as the reference; 1: use average as the reference; 2: use median as the reference)
max_pep_prob_thres: 0	# the threshold for maximum peptide probability
min_ntt: -2	# minimum allowed number of enzymatic termini
