# Supplementary material for: ABPEPserver: a web application for documentation and analysis of substitutants
Source: BMC Cancer. 2023 Jun 3;23:502. doi: 10.1186/s12885-023-10970-8 (PMC10239192; doi:10.1186/s12885-023-10970-8)
Supplement: Supplementary file 3 — Additional file 3: Supplementary Table 2. The table detailing publications associated to the analyzed data. [file 12885_2023_10970_MOESM3_ESM.xlsx]

## Sheet: Blad1
Cancer type	CPTAC study ID	Publication
Clear Cell Renal Carcinoma (CCRCC)	PDC000127	Clark, D.J., Dhanasekaran, S.M., Petralia, F., Pan, J., Song, X., Hu, Y., et al. (2019). Integrated Proteogenomic Characterization of Clear Cell Renal Cell Carcinoma. Cell, 179(4), 964-983.e31.
Glioblastoma (GBM)	PDC000204	Wang, L.B., Karpova, A., Gritsenko, M.A., Kyle, J.E., Cao, S., Li, Y., et al. (2021). Proteogenomic and metabolomic characterization of human glioblastoma. Cancer cell. doi:10.1016/j.ccell.2021.01.006
Head and Neck Squamous Cell Carcinoma (HNSCC)	PDC000221	Huang, C., Chen, L., Savage, S.R., Eguez, R.V., Dou, Y., Li, Y., et al. (2021). Proteogenomic insights into the biology and treatment of HPV-negative head and neck squamous cell carcinoma. Cancer cell, 39(3), 361-379.e16.
Hepatocellular Carcinoma (HCC)	PDC000198	Gao, Q., Zhu, H., Dong, L., Shi, W., Chen, R., Song, Z., et al. (2019). Integrated Proteogenomic Characterization of HBV-Related Hepatocellular Carcinoma. Cell, 179(2), 561-577.e22.
Lung Squamous Cell Carcinoma (LSCC)	PDC000234	Satpathy, S., Krug, K., Jean Beltran, P.M., Savage, S.R., et al. (2021). A Proteogenomic Portrait of Lung Squamous Cell Carcinoma. Cell, Vol. 184, 16, p4348-4371.e40. https://doi.org/10.1016/j.cell.2021.07.016
Ovarian Serous Cystadenocarcinoma (OVSCC)	PDC000110	Hu, Y., Pan, J., Shah, P., Ao, M., Thomas, S.N., Liu, Y., et al. (2020). Integrated Proteomic and Glycoproteomic Characterization of Human High-Grade Serous Ovarian Carcinoma. Cell reports, 33(3), 108276.
Pancreatic Ductal Adenocarcinoma (PDA)	PDC000270	Cao L., Huang C., Zhou D.C., Hu Y., et al. (2021). Proteogenomic characterization of pancreatic ductal adenocarcinoma, Cell, 184(19), 5031-52.
Uterine Corpus Endometrial Carcinoma (UCEC)	PDC000125	Dou, Y., Kawaler, E.A., Cui Zhou, D., Gritsenko, M.A., Huang, C., Blumenberg, L., et al. (2020). Proteogenomic Characterization of Endometrial Carcinoma. Cell, 180(4), 729-748.e26.
